# Supplementary material for: Distinct Olfactory Signaling Mechanisms in the Malaria Vector Mosquito Anopheles gambiae
Source: PLoS Biol. 2010 Aug 31;8(8):e1000467. doi: 10.1371/journal.pbio.1000467 (PMC2930861; doi:10.1371/journal.pbio.1000467)
Supplement: Table S1 — Annotation of AgIR family members. Nomenclature, chromosome positions, and conceptual peptide sequences of ionotropic glutamate (AgamGLUR and AgamNMDAR) and variant ionotropic glutamate receptor (AgamGLUvir) families in An. gambiae. Column headers indicate: (1) long form of gene name; (2) short form of peptide name; (3) VectorBase gene identification number; (4) chromosome location and base pair position (plus, + or minus, − strand in parentheses) of updated gene annotation; and (5) conceptual peptide sequence of new gene model (single letter amino acid code). AgGLURI and AgGLURIIb represent partial peptides where the 5′ end of the gene has not been annotated. (0.08 MB XLS) [file pbio.1000467.s003.xls]

## Sheet: Sheet1
Gene	peptide name	VectorBase ID	Chromosome: base pairs (strand)	Amino Acid Sequence
AgamGLURI	AgGLURI	AGAP006027	2L: 25,274,226-25,314,781 (+)	AIFEQGTDEIQSAFKFAMLNHNLNVTARRFELQAYVDVINTADAFKLSKLICNQFSRGVFAMLGAVSPDSFDTLHSYSNTFQMPFVTPWFPEKVLTPSSGFLDFAISMRPDYYQAIIDTVRYYGWDRIIYMYDSHDGLLRLQQIYQGLRPGNETFHVETVKRIANVSDAIEFLRTIEELNRWSRKHIVLDCSTELAKDIVVSHVRDITLGKRTYHYLLSGLVMDDRWESEVIEYGAINITGFRIVDTSKKYVKEFLDGWKRLDPTTSQGAGKELISAQAALMYDAVFVLVEAFSKIMRKKPDQFRAYTMRNRGQPFNLPANGTRTLDCNTSKGWVTPWEHGDKISRYLRKVEISGLTGDIRFNEDGKRQNYTLHVVEMTVNSAMVKVAEWSDEGGLAPV…
AgamGLURIIa	AgGLURIIa	AGAP000803	X: 14,739,086-14,744,472 (+)	MQGTRRGVSVHYLPAILLLVHALCGSVDGKREIPIGAIFHQVPDHSYESEIAFRYAVERVNMHEKHFELVPIVRYVSPEDSFRTERKVCELAAEGVTAVFGPSSLLTAGIVGSICKTLEIPHIITHWDPEPLGGIEAELRAMTINLYPEADVLSRALADLIVDYSWKSFTIIYDSDEGLMRLKDILQIHGPADAPITVRQIDDDPDYRPLLKDIQSSGESHIILEIRPDRILELLRQAKEVKMLEEYQSYIITSLDAHTIDFEELRYSRSNITALRLMDTKSFDIKNAVHDWEQGEARMKRPFRVSPEHVHTESALYNDAVKIYATAIRELDATEEITPARLSCGSKNLRQWPFGLRIVNYMKVKTEHGITGPIIFDDFGRRAHFHLDIIELSKDEGFK…
AgamGLURIIb	AgGLURIIb	AGAP000801	X: 14,618,285-14,702,072 (-)	GLFHPDDDHQEIAFRYAVEKINSDRTILPRSKLLAQIERISPQDSFLASKRVCHLLGVGVAAIFGPQSSHTASHVQSICDTMEIPHLETRWDYRLRRESCLVNLYPHPSTLSKAYVDLVAAWGWKSFTIIYETNEGLVRMQELLKAHGLSDYPITVRQLSDSGDYRPLLKQIKNSAESHIVLDCSTERIYEVLKQAQQIGMMSDYHSYLITSLDLHTINLDEFKYGGTNITAFRLVDPENPEVAQAIHNWTIGEARLGKKVDFKTAVSAETALMYDAVHLFAKALHDLDTSQQIDIHPLSCDTQDTWPHGYSLINYMKIVEMRGLTDVIKFDHQGFRSDFVLDIVELGPQGLRKSGTWNSTSGVNFTRTYGEQQKEIVEILQNKTLIVTTILSAPYCMR…
AgamGLURIIc	AgGLURIIc	AGAP000798	X: 14,600,998-14,612,301 (-)	MSTIGRRRWKVLFALLLITQLAAVIGYHHGDLDETVEHIKIGGLFDGATEDVELAFQYAVEAVNNEKLSYSNYQLEAQAVQVKYGDQFDASKKLCRLLKTGVAGIFGPSSPKSALHVQSVCDEKEMPHIETRWDAYTKLPTLNLHPHPHIMGRVFLDLVVAFEWKSFTVLYESGPWLPGIADLLKMYDPGYTVTVRQLDLGLNGNYRAVLRRVKLSEDKRIILACSIDSMPEVLRQAQQVGLLTDHHQIIVTSLDLHTIDLEPYQYSGTNITGVRLIDPEEDKIRQVADFLNASQIAKTLELQDGLNPAKMRVETALMYDAVLLFAEALKHLIGSEPAHLLEPIALRCDDTATWKNGYSVINYMKSSTIHGLTRSIRFDHQGHRSDFLLDIIELGPAGL…
AgamGLURIId	AgGLURIId	AGAP002797	2R: 27,638,116-27,644,376 (-)	MINVMENSESRRKMRLFPMFLHRLLVVAFAFLLIGPTDGYNGDFDEPVEHIKIGGLFDGDTDDAELAFQYAVEAVNNEKLSYSNYQLEAQAVQVKYGDQFDVSKKLCRLLKTGVAGIFGPSLPKSALHVQSVCDEKEMPHIETRWDAYTKLPTLNLHPHPHIMGRVFLDLVVAFEWKDFTILYESGPWLPGISDLLKMYDPKGYTVTVRQLDLGLNGNYRAVLRRVKLSEDKRIILACSIESMPEVLKQAQQVGLLTDHHQIIITSLDLHTIDLEPYQYSGTNITGVRLIDPEEEKIKQVADFLNASQIAKTLELHDGLNPAKMRVKTALMYDAVLLFAEALKHLIGSEPPRLLEPISLKCDDPTTWKNGYSVINYMKSSTIHGLTRSIKFDHQGHRSD…
AgamGLURIIe	AgGLURIIe	AGAP012447	unk: 1,553,896-1,557,262 (+)	MQCLGRVMGFNFLSVILLLVHVLCGYVDGKREIPVGAIFHQVPDHSYESEIAFRYAIERVNMHEKHFELVPIVRYVSPDDSYKTERKVCELAAEGVTAVFGPSSILTSGIVGSICKTLEIPHIITHWDPEPFGGLDPDLQAMTINLYPEADVLSRALADLIVDYSWKSFTIIYDSDEGLMRLKDILQIHGPSDSPITVRQIDDNPDYRPLLKDIQTSGESHIILEIRPDRILELLRQAKEVKMLEEYQSYIITSLDAHTIDFEELRYSRSNITALRLMDTKSFDIKNAVHDWEQGEARMKRQFRVSPEHVHTESALYNDAVKIYATAIRELDATEEITPSKLSCGSKNLRQWPFGLRIINYMKVKTEHGITGPIIFDDFGRRAHFHLDIIELSKDEGFK…
AgamNMDAR1	AgNMDAR1	AGAP001478	2R: 5,390,305-5,394,755 (+)	MKLTRMLPASCMLLSLMIPQALLAQKPTGSESPSYYNIGGVLSNNESESHFATVIAHLNFDQQYVPRGTTYYDKTIRIDKNPIKTALNVCKHLISRRVYAVVVSHEPTGDLSPAAVSYTSGFYQIPVIGISSREAAFSDKNIHVSFLRTVPPYYHQADVWLEILSHFGYTKVIIIHSSDTDGRAVLGRFQTTSQTNYDDIDVRATVESIVEFEPKLDSFSSYLMDMKTAQSRVYLLYASQEDAYVIFRDAAIHNMTEYGHIWIVTEQALSANNTPTGIIGLKLNNAENETDHIKDAIYILASAIKEMTVNETITEAPKDCDDSGVIWESGKRLFGYLKTRNIRGETGQVAFDDNGDRMYAEYDVINVHEKHSFVKVGSFHYDSEKRKMRLKINDSSITW…
AgamNMDAR2	AgNMDAR2	AGAP012429	unk: 284,129-400,942 (-)	MNETYSLCIIILFLSLSCNVALVVSKSYKVNSGRSGSGISIGNSHNNAANYGTHGSVSTGSANVNTVGFSSSGASGRLVINSGITSVGGGSTSSRLSTNGAPIRNPAEHQLNIGLLVPHTNFGRREYLRSINSAVQGLQKGRGAKLTFLKDHEFQTSNIHFDMMSLTPSPTAILNTLCKEFLHANVTAILYMMNYESYGRSTASAQYFLQLAGYLGIPVISWNADNSGLERRASQSALQLQLAPSIEHQSAAMLSILERYKWHQFSVVTSQIAGHDDFVQAVREQVGAMDHFKFTILNSIIVTRPSDLLELVNSEARVMLLYCTKSEAIEILHAAEELQITGENYVWVVTQSVIENTQTHPQFPIGMLGVHFDTSSGALVNEIATAIRVYAYGVEYYLN…
AgamNMDAR3	AgNMDAR3	AGAP005527	2L: 16,640,867-16,647,151 (-)	MFALPWKRSSTLLVVELLLSLLALAGLTVPSSASSSEETLDADATVEFAGGPVAAEMLKAHPAGGAFTVDDGSQPVFPERPDAVYFAVAVTGGAKLWGRTLARTLIDMGPPFGHPQGPPLRPIYINLPDSGRFSSKLMTTACDSIDGMPLSGMVIVGDSPAAKSLALAGNAMKVPVLWAKGGIATLHNSYDEVHWHSYHILCDVDTYVLISGKKGAPLRQKPLNPIIVTLPTNFDLIYKKLAFISRSTKGVVLVLCNLKVARLIMAEAQRMKMLNGHFVWLWMDTTSATEFYDSGQPSYDPKQQQPLDYPTAEGSEMKLKRSSEYLKPHNSSGHVLYHHNQDFPVGLLALRPIKMKIDRHFIRAAVRLFAATWAKVERDDTPAAGGGKGRGGPSGRDGL…
AgamGLUvir7h.1	AgIR7h.1	AGAP013154	X: 12,751,181-12,753,181 (-)	MCNEHLRFVMLLLLLLLVTLQQHTAGSAIADERPNHIDRWVSCIGEIVLANADTFRHELNIFTLGGGETEEESLHFEHDLLDRLLARLVYRHADKKPFTFNLAPYDRTVSYNQRNLVLILLHDLRQLEQHLLPQLAAKNVEQRGYFLLLLVPSNATTTTTAEKHVAATFRLLWSVRLHNVVLALERRRPTTRIDLLAYDPYGPGCCGCSRPRLLAHCNAPPPPLYDRFERNLHGCQLRIASFERAPFLEFVHRPGRNGTATATPKLTGIEGNLVELLAAHLNFRVAIVQPADGRTWGRIYPNGTANGALGLLLNGTVHMTVGGYFPYPALLAATTQTHHYYTAELVLAVPEELATLSPLEQLLKPFQPAIWTVVAVELAIGALGALHRRHRLLHFWRTV…
AgamGLUvir7i	AgIR7i	AGAP013363	2R: 26,793,376-26,795,314 (+)	MKVLLMVSLCCIATSLCAMVPVSDHHRNKYHHLTVPIAHHFKDTNIPVVFWLDSPVYVTNQSTQLDALHAIVLAHSDWMVAVFRSSLRCMRCRTRLQNVFIAATVRSLQTFLASLEYDCFYPSGRYIFIVTEQLAREATDVRDVFEIVWKNRIVHVVLIVSRSNDTARFRAYGYEPYAYGKCGKVRVKLIDRYTDAGWRRLAGGWFNCGLPNFNQCPLKVATFESKPFVMVRTVGNVTRYSGLEVKIFNHIAAKLNVSIVYTPPPNNTRWGVLLPHNSTGQMGMLQRNEADVGFGSVGRSIERDLYLRSSVPSIVSQLSMTIPPRLPYTALEKLFLPLRPSAWLLVAAGYTTILCLYVVLFRGKHRPRRERIPGLYYTFWTILMGGPGREVHRHSTRLY…
AgamGLUvir7n	AgIR7n	AGAP000714	X: 12,757,892-12,760,135 (-)	MRLSWTCTGQLLVLLLSVLRFSAAAANLANNKTLAKLTGQLQSASFTHTELLIGATAEILLQHYTTLTSKQLYVRWEDGASGPLVDEILRRTATHLSVLVERDPPVTPADGLDQSHHPQLRLLNLLLVTDRAEFDHVVAGLTDELYDYSGLYTVLLVGASSKRQHLETAGIILRTLWALYIVNVVVLIGDGRQQQADGDDDDDDVRLYTYFPYGEDYCERALPVVWNVYERGVGFVHREHSPFPPKLDNFYHCPLAVATFPVYPFIIPSAMMADLWPGHPERTEQEEEEDLKGIEAMVLRTLRQRLNFRLQLMNVDPPDWGTAGPRDQATGASAYIRHLRANLTIGYWATTLHRNRYMANSFAYYTSQLVLAVPPGAPYTSLELLRCPLAKPIWTFLLC…
AgamGLUvir7s	AgIR7s	AGAP013409	X: 12,762,561-12,764,534 (-)	MWWRRRVQLLIAPLWFHCCCWAQPPLPTQPLVNLADIVGVVLHTHFRTPFATTLVTVRSATQRGAWLQQDLLERLLVRHGQGQLVVQLEGVPSPVQLLHRHPPWSRTLLLAESYDALRTVFGQLTPDRFDFTGRYLIALSEAPATLATVDRIFHELWLRQIVNVVVALRPLDDDHSSAAAAAGPVQLWTYFPFSPGLCRIPKPHLLFTWPNDTLLYGVDFYPRKSDQFHGCPLRVGSFETRPFTILAGGDGANPPAVGGFEGDLLHSLSARLNFREDVRVPPRAQQWGEAAFENSTGLMRMLYTEEVDFGLSCLGVSVERSAMLKAGKVHFTTDLVVVVPPGKPYTAFEKLFQPFQPPVWLAVGFCTGVGLGVLATLRLLPLDGRQRATVRRYVAGDAR…
AgamGLUvir7t	AgIR7t	AGAP002763	2R: 26,797,736-26,799,713 (+)	MGSAIIIAIMHLLVLSVPEVAAHLLNAKPSGNPATVTQQASLLTPIVQTHYRLPEGFVAVRVQNGGHSNPSHQQQDLIDGLMRTGHDWLAVSFDDLPAAERRPAYYGVFLVADYRSLCTLLDGMTPGAYQFDGLYTIVIEQRRPKLHDVMERLWSYRLLNVVVIVSEKRANEDEERYVAYTYDPYREHRCGSVEPYAVGQYANGTWTELVRWYAKRTDNFNGCPLVIGTIHIIPCSIIERDGPGGSTTHKGIEVSQVDDLSRRFNFTPEYRISNGSTRWGFARAVNSTGLMGWIQRGEVDFGLGSIGISLSRVQHLRPGIASRFGQLAMAIPPKRPDSSVEKLIKPFSRQTWLCVVLGLAGISTLAWALFGIGWRLVADRLRHPCYTVWVLTMGGPCGA…
AgamGLUvir7u	AgIR7u	AGAP013285	2R: 26,795,525-26,797,440 (+)	MKLFAALLALAMVAQHCYCSAGKLIPLVDAVSATEHLQAPLKQHFKYPTFPVNFRAESSENGTTTTTRELFEMNELMRENSGWLIGTVSGRLPIVTNPYASFYNVFFADGYDAMGKILQTLNYTDYDPTGRCLLVINAAYETDHMVQLVAILWQLRIVNVALIVQEAATDTDSYRAYSYDPYREGKCELLEPLLLDQFVAGRWQSLHRWYRNKMENFHGCSLSVGTFAAKPYSMVRREGNATIRYGMEVSIVENVARWFNFTIDYRSPAGTVKWGIIRAANSTGMMGMIQRNEVAFGFGCMGYNEYRNRYLTVGLPSFITQLSMAAPPARPFTWLEKLFAPFTLEAWLCIALCYAGYLLLTVLVFDSRLVTTVEHFRNPAYNVWVMLMGGPSRPVRQTS…
AgamGLUvir7w	AgIR7w	AGAP013416	2R: 26,799,941-26,801,942 (+)	MLLFCLMLWCTFADGCTVQRREEEMPPEFLQSESTNTRFLAPILRAHYRALALEVHFRSWNGNDTQRQLTPWQGELIDDALCRNADWMIVSFADLLAPAVQRRSAHYSVLLMLDYDALCSWLQHGLDSGAYHFDGLYTIVIEQLADRGQLHAVMRELWNREIINVVVVVVLASGEADNRGELVAYSYDPYGEGQCGNAAPYEIGRYANNNGTWDRLAGWFPNRLTNLHGCSLTVGTVEVSPFSMTRTVDNRTVQYGLEVHIVDTLAARLNFTFRYVRPTDGVKWGILYAANSTGLVGLLQRRGADFGFGSLGFSLNRHTYLRMGVPNHMTQMIMGIPPKRPYTSFEKLFQPFAADAWLCIALGYAAFALVALALVTVNRRLAREPALQHPLYQLWVLLM…
AgamGLUvir7x	AgIR7x	AGAP013520	X: 12,767,186-12,769,138 (+)	MAPLPVWWTSRLMCCWLLWSTTAARAQIPPQPDTDQQLLPHIVTHLLQRYLRHPFQPVQFFLAANTAPHLLAQRDLLSQVLRHTSGQAAVTFGSSTNNPVGLRAAVQQQRSRAILFGEDFVAFERLVANFSTTLNDYSGRYLCVLTGASGSVHQLETKHLPRLFDALWTRHIVHVNVLIAAANGTVRAYTYQPYTPERCGKPAVKLAAVFAPGSSVDAQPHLYPRLTTFWNCTLQVGSFEAKPYTLLRPKVDGYTELGGFEGDLLHLLASRLQFRVNVTESPHQVQWGVIGAPGNSTGTMQLVQDELVDLVIACMALDVTRGLYLKAGWAHYTSRILFAVPQGRPYTAFEKLFRPFGTAIWAALAGTLLGVAGVVGGLSCGRRARSWRRFVYGPAVRMP…
AgamGLUvir7y	AgIR7y	AGAP013172	X: 12,771,474-12,773,520 (+)	MNRWTILLLAAGLRECRPEDSNGGMKRLVVRETVGNHFSEVIVNALTRYYVQNHSSTQVMRLSTVSDGTYDLQSDIMDEVMQRTSRSIAYEFRSALGPSRRPRIFNIAFIDGYGAFEQLFRSLDPAENDFAGYYLIVLTAYGRRIAPDTLARIFALLWTMNVINVNIVSADLEDQSRWQSVLMHTYYPYRAGGNCERIVPHLLHRFRKGQRLDRSVELFPSKLSNLHGCPVTVGTFHLPPYMLLTPAGRYGGLEGDLLRALSRKLNFTVRLVVPDDGELWGRTPSPSVVVADANRTRGGASSASGCVRLVLTERVNLTLGRFAIRGDRNLVMKSSRSYYTVRMVLAVPAGREYTPFEKLFRPFSRSVWVLVTLYLLAGMVVIGTVQLLHRPAVRDFVYG…
AgamGLUvir8a	AgIR8a	AGAP010411	3L: 2,867,389-2,870,222 (-)	MVGNVMKKVMANANGISIKEYYIQYDHEFAPFGEDEQFCAAMFEGVSVLLDTTWIDSRYLASAAEEFGIPYFHIDLSVQTYVKLLESFLLARGGNDVVYILPNYQDADATIYLLITDSYLRAIVFGELDGDTVDRIKDLRPYPSFYAVIAGTMEMNTILQKAIDGGLVRKPEKWNLLFTDLQTDKYTLGDDFPQMNRLVLDSNTCCILLQQRFPCICPDPFDPMDAHLQNVLERIVQWFIKDPIPLVRASNCTPESQQQELLEHAIAAQTKLMNEIAAMAEFWITLESGMLRPNLNLSIISQPANQNTTSAAAQPPPATTIGNVAKGQIVLVKNESLKPSKRFFRVGTTESIPWAYRKRDPNGNILRNSTTGEPIWEGYCIDFLHQLSVVMNFDYDLVS…
AgamGLUvir21a	AgIR21a	AGAP008511	3R: 11,468,382-11,471,590 (-)	MFKRIVLAVINLVFLIVSTTAFASLHYPESFNQQLIRYKGRDSSNGYFELASEAYYTGTYDLVEELNETATCLRADCREQSNSSPVVRDRRRVDPTFYGHPKTREQIWERNFAHVIEDNRQTLSLVTLLNKIILKYLHSCIPIVLFDTYVATTENYMLEALFSDFPITYITGRIGPNYTLDNPGILEPTGPQCRSYIIFLADVMMTRKVIGPQMNSYVVLIPRSSQWKLQEFLAAKQSRDIINLLVIGESYSVDKRINNEQPYVLYTHELYIDGLGANRPQVLTSWIGNKFSRNNVNLFPRKLRKGFSGHRFTVKAAHQPPFMIKRLSTDGVGNVNIRWEGLEMRLLRVMAQYLNFTYDIIEPGRTELGPGDAVVEEIKRGQGDMGLAGIYVTIERNLA…
AgamGLUvir25a	AgIR25a	AGAP010272	3R: 51,917,004-51,920,704 (-)	MDPKNGRRWLVLIPIQLASYAIIAIMGQTTQNINILFVNEVDNNLANVAVEVALNYVKKNPQLGLSVDMMYVEGNRTDSKDLLQALCSKYGQSLSENRPPHLLLDTTLTGVSSETVKSFSLALGIPTVSASFGQEGDLRQWRDLTPTKRGYLLQVMPPADMIPQVIRSIIIYMNITNAAILYDNTFVMDHKYKALLQNIPTRHVVTTIADDRDRASQIEKLRNLDINNFFILGSLASIKQVLESAKNEYFERNFAWHVITQEQKDLTCNVENATIMFLRPMSDSSSKDRLGSIRTTYNLKQEPQITGFFYFDLTLRALIAIKNILQSGSWPSNMKYITCEDYDGTNTPNHTIDLKTAFIEVTEPTTFGPFEIPKGGKMQFNGNTYMKFDMDINAVSIRS…
AgamGLUvir31a	AgIR31a	AGAP009014	3R: 23,550,606-23,552,617 (-)	MNNTVSWLLLSRNTTADLLPRVLWNTAGIQMNSDLVTAIETTDHRGVFNLFDIYSKGRHLCKDIFQTLLGTWSADGGFRLTPNYSPYKIRQNFNFLQLRGVTVIDRENVTSGKVDQLLGEPGLTKGIVAFVKYHYALLVVLRDFHNFTIKFRPTRGWAGRLRSGYRLGLLGVVQRHETDVAATGIIMRLSRQPELDSIHYSWAFETGFIYKITPDIGSKSEGNGFVAPFSLPVWVALLLSLALSVLVLQYLARLSADERNTRATMAYVLDVMACVAQQGVPNVSRLVPTRVAVIVLLVANLVLYNYYTSTVVSGLLSSQMIGPETIAQVIDSPLLLSLTDTGYHRILLREQTLPYSTRMHERKALPPRSPNDLPLFTDVEHAVPYLRRGGHVLHCELTE…
AgamGLUvir40a	AgIR40a	AGAP004021	2R: 47,922,057-47,924,755 (+)	MGVGSNSKYILALVLLRVALVWGAFPTQRNLIALYERSNQSGMIRGISEMVNLLAPKSLVILVQNETKIDRLDKLTVMIHHHNIPTCVYYDLEAYFSLIEENLKKSLEITSLIFCHPEDMLQDITDRRLAHRLSLFIFYWGAAQLPPTLNPNLLMEPFRVAIITNPRRNIFRIFYNQAKPNNRGDMLSVNWFDGNDMTFKRVPLLPSPTEVYKNFEGRIFTIPVIHKPPWHFIVYGNGSASVGDNQNSSSSDAAGGFELELDENVTVESDDTYFTVKGGRDHNLMQLIAERMNFTFQYVEPPEKIQGIALGSEDNASFSGALGMLQRREVELYLGDVAVTWERMKAVEFSFFTLADSAAFVTHAPRKLNEALALVRPFQITVWPPVIITILISGPILYI…
AgamGLUvir41a	AgIR41a	AGAP002904	2R: 29,130,386-29,133,257 (-)	MNYSVELSELTQGELFHFELNRLLKWIFLQHLVSFFCTCIVVRTGSSGHWTAATEQFPHPVMVVALSRNDELDVLLDAIENGCQTFIVAQSTAIEFLDAFRYVHDRATVRYPHKRVIILTDDADVQWRRTVFEHGAFRDVMDWLLVHPLPDGKRVDLLTTGYGYDEWIPLASHDTSVPGVLHLTVELFPNKRTNLWGRYVRLAIFNYEPYTLWSAVDDSNDGNAFYQHNRTLFIDGTEARLFVEFCAKLNCSLEISLDEAGEWGQIFDNRTGDGIIGAVVERRADIGVGALYSWYHESLYLALSKPISRTGVTCIAPKPLPLSSWMTALLPFSTEMWLAVLGTIAVSTVCEMVVSFVTQKFNPNKVHRVDACESIMAIISIFILQSVLIRTTRNPYCSQ…
AgamGLUvir41b	AgIR41b	AGAP008759	3R: 17,137,047-17,139,240 (+)	MELSTDLLHFTSAFQLFLQTLALTHLSGHYSVCVVRSITDDVRLEFPRAIVTVTLASPANTTDTTFGDRLVRSINAGCEGFMVLEGALFPFLDHFRSAHEAAYFRAHNKRIIATVRLGPVARERLLQHDTMEVTPNMLLVEVNESEGMVGLYTTKLSPQEPRGIVAELMLLERLRLGEELLLGLPESIRKFPNKLTDMEGSRVRLSTLPYPPCSVANEVPLGEGNARSTVPANYSLQADGTEILMVLELCRRHNCTLEIELVANSEWGQVYPNGSADGLIGSLIDRRSDVAVAAIYRWYNWYQYMTMSAYTGRSGVSALVPRPRLLPYWQTPFLSFPPSLWLMVAVSFCVGTVAVFLTEHARHHIRPLSGSTSHNNRLIDSIFFMVSLYVEQSVPLPNS…
AgamGLUvir41c	AgIR41c	AGAP012951	2R: 39,202,960-39,205,188 (-)	MDYKMVNFLPLDNFNTSLQFLLTHLLRLYYSQHYTVCFIRSFHDNIPFTTGEPPLPLVHIVLEDEVLTAAAPPNGTAWATKKEEFCQKLLQAVDTNCGGFVVTESTLFPFLEHFYEVHKRAKLRPSPKHLIAMTTSATFDRSRLLQYNQTLEALVNLLLIVRSSSDKGNHHRKDAFELHTTQLLPNYPLGVRIELVQIGKIVLKQDANGVVEFEPKHDTEIDFFPDKVRDMKGRRVRVSTLEYVPCSVYKKPIGQGNAKCADDAAHEFWLDGFELILTMEFCHRHNCTVELSMINQTDWGEVFENGTTTAILHDLVEQRADVGLGALLAWHAWFQLTTITQMIGISMISALVPKPRLLPFWQTPFLSFPPSLWLVVGITFTAGTLTVFMVSVARLRILP…
AgamGLUvir41n	AgIR41n	AGAP003531	2R: 39,207,749-39,210,030 (-)	MENQNPTHSLLHQSIIASDDIVGLNSLVNYLVLTYFAHFFGICLIIARNDSFHHSAPLPTIVLVIQDNDDFEKALGVAVDMGCQVGMEISFIVTEHAAGAFFDAFLPVHEAALQRSMEKRVLMLLESSDSPFLSTISQLLVVEVQATGAVQLYTLDISDGNPVTISPRVIDVIDTRNDSFPNTKSVNHFPDKFANMNKRRLRLGTVPYLPNAFIEDKPLGEGNARYILPAKPNVSAMISGTELWLVVLFCEIANCTTEIMIASEWGNVLDNGTKFGLLGAPAKREVDITLAGLYTWYSSFQHLAFSAVHSRSGCTCIVAKPRIIANWRTPFLSFTGSLWGAVLAAFVAGAFAVLVMSRSRQRILQLGEATRYTFSDSVLIMIGFFMEQGVPMPNELVAS…
AgamGLUvir41t.1	AgIR41t.1	AGAP004432	2R: 55,960,058-55,962,321 (+)	MEATVAQLGLNSGVPIPTMSVLMRFLILKYYSQYYSFCTVGNDFLQDVPLSRIVLSLYDQLNTSMLHAIDNGCQAFVVDEQGAERFLDLYLPVHDLARQRSLDKSLILLIAKRNQTHLFNRMRVHEAFRELANVLIVVYDEQERPTDLYNTVVRISDVLERSVNVAMELVAVKWTSWKNHSFFPDKARDLNGYVLRTSMCNYLPFTGYERLDQETGNAFDSTTGKRSIWLDGTELQLLVSYCERRNCNIMVFPEDEDEWGDVYPNGTGIGLMGSVAERRTDIAFGAFYLWFKPYNFSSYTATISRSGVTVLVPKPKLLPHWRTPFLSFSWPLWIAVMVTFLVGIIATWLAGTVRLRLLLLSAPTDQPWTGRSDLISEQLTLSDAALMMVGFFVAQSSPI…
AgamGLUvir41t.2	AgIR41t.2	AGAP012969	2R: 55,988,209-55,990,472 (+)	MEATVAQLGLNSGVPIPTMSVLMRFLILKYYSQYYSFCTVGNDFLQDVPLSRIVLSLYDQLNTSMLHAIDNGCQAFVVDEQGAERFLDLYMPVHDLARQRSLDKSLILLIAKRNQTHLFDRIRGHEAFRELANVLIVVYDEQERPTDLYNTVVDMSDVLERSVNVAMELVAVKWTSWKNHSFFPDKARDLNGYVLRTSMCNYLPFTGYERLDQETGNAFDSATGKRSIWLDGTELQLLVSYCERRNCNIMVFPEDEDEWGDVYPNGTGIGLMGSVAERRTDIAFGAFYLWFKPYNFSSYTATISRSGVTVLVPKPKLLPHWRTPFLSFSWPLWIAVMVTFLVGIIATWLAGTVRLRLLLLSAPTDQPWTGRSDLISEQLTLSDAVLMMVGFFVAQSSPI…
AgamGLUvir60a	AgIR60a	AGAP011943	3L: 35,436,382-35,438,481 (-)	MLLVQLVGAMLLALLPSSVNGIVYVRIRNERGPTAARAGIQCLELLSHTYFNMRETTQIENIVIFYLQNLSSPAREILLGYLQLHHTGYDIHEDDDDDEDGEPESQFQLKLMSDSVSSDDLRRAQFMDHKQIDYYVIVIDSFEGLQSALDRISATAAFNPRGKFVVLYNNPNDRDSNARLANRALGHLFVGHHSVNVLFAFAIDATSYHVYTGDPYHGATDCGQMKALKVATVVNGSFASRALSTAMINIPKVPPELESCTFLLCTRVAPPFIDLDCSRGLELQIMDLLRESMKFKVNVSCSTMDRGELEPDGSWSDLLGLMRADECDIIAGGFSPDFDVHDAFGSTTLYLQDYYTWFVPAAGPDARWKLLVYIFEPTTWEAFAGVLFVSALVWRLVAH…
AgamGLUvir64a	AgIR64a	AGAP004923	2L: 6,087,139-6,107,636 (-)	MHRVRSAMRLMGHKRMMLSSWIAVPAILLAAVGLACGYAVTSNDYSETVATFVFRFIRDHKGLKLGIVFGCDQKLLLIYNVLSQLATIGVRARMVHIGPGPTPDRNEQEHERFSSTLRQSLEFHQFVLLDMACENAPDVLKQVSRLFIHPNGAGSGLDRLPAHACHAHVKPSVVGTMWRVCNTIRYCILPIKASRYELFNASFHWLIIDNHYNSVEVEGNTGENGLFTCPWTMITNSTENGGTAKPIQSFTNGTEPDGAMDSDWTASSNGSEATASGHTFDLLATMNVSINAEITVASPTDPSYRGFTLYDLWNPGFISGGKLKIEPLGCYSPAEGLQIPKRESTVVRRRNMDGLRLKIMTVVTQKPHQPFELYLTTPQNTHLDSVHRYNYGLMGMLKE…
AgamGLUvir68a	AgIR68a	AGAP007951	3R: 3,275,939-3,278,326 (+)	MCKTSRLVWILTAFVLILGVKHCANKQLNSATKGNDRKSSQSIHHEEYSTELHLEMLLLELAAKMDYGHCYVVLFDEVYESVLNAAFFRQIHRAARYIVKIEQDEDTFNPRPSLKCILESTRKAGCGGYILLMANGIQMALYELSTAPFPMQIKGVFFSKILNFWQGGKFRLANSTFFDDKTKDLRRQEMRVVVLEHTPAVFKSATTSNYYGLEIELLKAISKAMHFQMVFYETSDADKERWGRLGGNGTLTGIIKEMQEGKADFALADLHHTEYNLGFMDLSVPYNTECLTFLTPEALSDNSWKTLILPFNGEMWAGVLLSLFAVGFVFYAFSNTLMLKWLRHKKPKTNMSKSSAYDRNKLKKLRMIPFKRQPEPWHDPLPANDMFDTFSDCIIYTYS…
AgamGLUvir75d	AgIR75d	AGAP004969	2L: 7,301,252-7,303,528 (+)	MHSYYDETISHQQEKRDDREQNRLAVGVYSVLGTLLCYVGHVEPKSKHVKSVTVIRCWEAEERYDFFLAATRKGLLVKFVDATNIEALIAIHPNRVSQAGLLIDASCEIEPISKLWQMDQILNKLLYGNLHWLIVEKQLPVKRSIDSGPYSSDQLELLYNERLRPLDVMPYTNVVLAFLNVSDSWELFELYKPYRKARLSVVNIASNYLPAVDRYGSQLIVRRKLVDRRRNLQGFAMPCGTATTSPEYFTGMDDRNDVHDLFTKANFPFIRELMYDLNFTLNMVQLDKVGYKQNGTFSGVMGKFQNRSIELGCLGTLMRTERLEVADFMIVTLIIKSSIIFRQPPLSIVANIFELPFSVGVWACCFALMAIYWMTMIAIRQLTSGERFGAIESLVYIIG…
AgamGLUvir75g	AgIR75g	AGAP013085	2R: 10,846,334-10,848,911 (-)	MTKEAVESTRKQTRIILHKVLIHQLHSAMKNHPASMSFLNVASFSGSKFEASLQSLHVGVGLMADLNCDGLAGVLKALSVRGFFNGARFRWLLGGLGTLQQSRMFLEKLNITASSMVLLTLPMRTSNNDTNFAILDVCGHRVGTRWELSFLQIGAWSTSAGLTMWDKRSVYERRQNLLGMQLTGIAKATAIGASTVTGELQSGRAYGLRLWNVLSTMHNLSITENPVNEGNQQPFDLIINPVEIKQQDISKLHYTAAVHDTQYVSLTILLFLHPNVDWTRNLFLRPFTVLSWLGITALFLAFLLLMCCILHLDRLEGQDRENGILVLVLGILCQQGFIETFHSYASRITVFAMILFSMLVYQFYLTYIVSFLLVVPPKTIHTLHQLVENGFAVALENVP…
AgamGLUvir75h.1	AgIR75h.1	AGAP001811	2R: 10,851,283-10,853,577 (+)	MKVVVCALFLLGLLTPTRCSSRTQLIKEFLEQRSITSLLLLHCVQELVDQDVIRIASALRQSFHGSVYYLDVTGAHFRRHFQWHMFYERYKTAITLNLECSGMESVLSHLSDNAYFNDTFHWLMFGGRNFEQVTCLLSAQNINYDASIMLVFDRGDRADVPRIFEVYDVRGTVKRRGGRVSFDLLGTVSSLNQLPKRRARSQDLEGIELWTALTTISKHQPRPLIEYLNTVKRQTSYTATIHSYQLVKLLEMKLNFKLIVILTEDWRFDLIGKNSSRGVVGQIQTKQVDFATTPFAITPERIAIFEYTIEIAHGTFYTVFRHPKSLNNSNIFMLPFTNIVWLAISLIFGAVALLIALLIVCIHRTGRSRSTLDWLVEQSLLGTLGMVCQQGIHHRIIRW…
AgamGLUvir75h.2	AgIR75h.2	AGAP001812	2R: 10,855,568-10,857,858 (+)	MKVVVCALFLLGLLTPTRCSSRTQLIEEFLEKRSITSLMLLHCVQEPVDQDVIRIASALRQSFHGSVYYLDVTGAHFRRHFQWHMFYERYKTAITLNLECSGMESVLSHLSDNAYFNDTFHWLMFGGRNFEQVTCLLSAQNINYDASIMLVFDRGDRADVPRIFEVYDVRGTVKRRGGRVSFELLGTVSSLNQLPKSRARSHDLEGIELWTALATIDKLQSQSFIEYLNPVKRQTSYTATIHSYQLVKLLEMKLNFKLIVILTEDWRFDLIGKNSSRGVVGQLQSKQVDFVTTPFGLTTERIAIFETTIEIAHGTFYTVFRHPKSLNNSNIFMLPFTNIVWLAISLIFGAVALLIALLIVCIHRTGRSRSTLDWLVEQSLLGTLGMVCQQGIHHRIIWW…
AgamGLUvir75k	AgIR75k	AGAP007498	2L: 46,923,249-46,925,420 (+)	MDKSRYLQFLVQSLIVLKVLTVSNGTPQATAVNPLSPQTQTDQRIAAVRDLLVHLDRAHQLLVLTCWSPSVRYALWQSVRESTATSHRGTASVRFAPIDQRHLPWHDPNQHQIVIVLDLSCPGTDRLLESARQLLYYRVRWIVFRSSIEESGGSVRGWSNCSEYSVLDRLPLLVSNELFYFCTETSTGQHLVRQQYRLAARSASSSVPIYETFGTWNAALGVRVVVDSKVRPPVTSIRRQNFHKFQLRASLVILHNETLNHLDDLHDKHIDTLSRVNYLLTKSVAHALNATVKFSIVDTWGYRDRETDRYNGMIGELQRDLADLGGTSMFFTQDRIKSVDFLAMTASTRASFIFRAPKLSFTSNVFVLPFDQYVWYCTVSFIVLSGVLLLVMLRTEQRY…
AgamGLUvir75l	AgIR75l	AGAP005466	2L: 15,949,821-15,952,169 (-)	MGGRDKQDLILPLMIAPLLLSGYSVAAAVDASMVGAVGALLKLIGTPLKVTAFVECWNEGEKLMFARIGLSGGRHLMQFVEPRRASPDARTDVKDMDNYRNATLDEDAESHQTLVVVDLRCNGSERLLAEAGQRLYLNYRWLLMDFSEGGAPLGIEHYLAVLQDLPALVSSEIFVMLEEDGQSIRFMQVYRVSQNSELLTEHYALWNATVPGDTEGEMIDLRTHKVTSVRRKDLHGHYLRASMVITNPDTLNHLTDYKDKHIDTITKVNYILTNCLVAYLGAEVNYTRVATWGYYNTTTGMWDGMIGELVHNTADLGASPLFFTTDRIAVIEYLAMTSETRSKFIFRSPKLSYTENVFVLPFDDKVWICVIAVIIVSSVLLLVTLWAEWRITNGDLDMP…
AgamGLUvir76b	AgIR76b	AGAP011968	3L: 35,687,053-35,692,621 (-)	MDRFPVMMMMMVRFVKPCARSYALCRAERWPDKDHGDPQRRRYGMTATVAVALAMMMMIVVATTQLGVDAQGIAPVEWDGNETTEYYQLEMDASAEVKEREMQELRRRLAGTTLRVTTLQDWPLSYTVKINGTYIGAGVAFELLEFLMEKFNFTYELVMPEQNIVGSSNDMAGSVLQLLTNGTADMAVSFLPILADARQHIRYSTGLDEGEWIMIMVRPMESASGSGLLAPFNRDVWILILVSLLAVGPIIYGLLILRHRLTKDKEQIIYTLPHCVWFVYGALMKQGSTLSPTGDSTRILFASWWIFITILTSFYTANLTAFLTLSKFTLPINNAEDVRRKEKQFVTIRGGAIEYAIKNRDEALNALSVLVDKRLVDFTTNVNDSDTLADKVAKQNYVF…
AgamGLUvIR93a	AgIR93a	AGAP000256	X: 4,900,441-4,905,540 (-)	MVLRLVGLWSILLLLLLLLVLRPDPAVGDDFPSLLSTNASMGKLNITPLLSIILDREYLGADYERTLDETKNVVEKLIREHLKNGGLIVKYYSWTSINLKRDFSAVLSVSSCKNTWDIYQEAVRERLVMLSITDPDCPRLPTNNAIMIPRSDGSGSNAFDEVSQIILDMKSSRAINWHTATLLYDQVYDAEISRCILSLLEDREGIKPLTLTEFKINAPTHSWEKRKEIRRTLLGIPTAYTGRNFIAIVNIATLTLLMEISKDLKLVNPFAQWLYLIPNTEKANSNFTTRSTLINEGDNVAFVYNSGSKAQNCTVSVLCYIESYLLHFIRSLSKLIREEQVVFGQISDEEWEIIRPSKQERKTKFLQMIKAAITSKDECNKCSQWKIQSAETWGYVYRT…
AgamGLUvir100a	AgIR100a	AGAP000140	X: 2,149,577-2,152,578 (+)	MRWIWAAVVVVVLAAANLSASDPSTTLSFESLSSQQQQQESDQSDALIATIFATIDHLDIVNGAAGAAETQLLQHRTVRWFDGEPATLCGAPPASEHSECFAPPERPTDRHQWDGALAGAGLILYGSVAKLDRYACLFEPAGTYLLVDEPSRSPLEQAHLRRLLGTLWTTRGAYRVYVRARGQLYGYDPFRRPAGAAEYGALVQLEDGRPLPTVPLTDFGGYPLRIEVFRSVYSNPDERASASKADQITYSGPDVMARDVFCRALNVTVIPVPADRDLFGDRLPNGSFTGALGRLVRREVDIVFTGFFIKDYLARDVEFTAGLYSDAVCCLVRKASRIPEALLPLYIFPGDIWALLGALGLACASVWALLRWCVRHVKPPAGGLWSRRHRLAVLFNLPR…
AgamGLUvir100h	AgIR100h	AGAP000293	X: 5,199,638-5,204,600 (+)	MPEAVVPCCLLLLLLTLPLSAGSLPAGGVDLIARTPYSLDAGSTVPVRERLIALERRLVQQQQPCTRLLIVFVQLSDGRPPHLAGDTLSLAIDAFAPGHRTPRLVLRGDDEAAADALSSAATLADRDSYCVVLILLLPDLGNSLPGTLLQTTARLFPLALKLLLLGSAAPTDEELSAARTLLAALWQTERALRALTIWYRPATGLLIGAYDPFEPPAGRFYTLAGPNRTDLPTDLAAFGRRMNLRGSAITVYGFEAAMAYRRQDIDMLPRTFPARRPGSTHASRDALLDALFGADVEAVRELARRMNFTPVVHHMRANFGFKMANGTFTGVLGRLVARDAWLSMNVYFLKDYETRDLQFGAAVYQDSLCVFVQAAGMLPDWLLIFRCFTPTLWIGVWST…
AgamGLUvir100i	AgIR100i	AGAP004475	2R: 56,749,587-56,751,832 (+)	MFTKGFIVAITLVHMWLGTSCSLERMLPEDTLIGPLVEQVMRSLLLRYFRSARLLLLGCYRFSLLEIPLLTFTHELADDGFMDWIQPTVEDNDQPIQRMNSTGFLSARDNLFVMPDHAEKLHFFNPFHAEETEQLLTFYVGEDFAMSPTADNKLNIFNGIPIRCTVFPRNPTLLPWDSLPASFREVHYVQQSVRASNGSGGLDGMLLGNLAVALNFTAETMDASDGQEYGYRLKNHTFVGSLGDLLQYRTDVSFNVRFMKYYDTHGIEFLHPIYSDQLCILSPKSLEIPQWLAIFLCFHPYVWTSFVVVGFAGGYCWYLLKRWTLRKVSRYRQHLLKGDRAQYTVLSIEMWLVLLGASSTYLPVRMIERTLLVAFLIANVIISGTFQGTLTTAFSTKSY…
AgamGLUvir101	AgIR101	AGAP013425	2R: 42,015,346-42,017,474 (+)	MKQACSCVLLVLLWQRVAAVLDPLRHNDCHSRAVSMETRILDDYLADQHTVTVIESCTEIPIMSPYCMHNPVPLNAFTLHRFQAFVHQSLEHTTQELEYRTNECFVGSGHMDDLLTELLPYLSEYNPRAKVMLITQEMADQELAELFHAAWYRYRLLQLIVLNHRANDTIESCLFNPFRKALSPELRYLPTGKSDLHCRLLTDGQQLDAYNRELNLFIDDRVYNLNGYPLNIAMHVSNGSTSAYDCILGTVSFTDIDQEILSIMQKQMNFSLILHKNELELSIGYIHQNGTPVGTLGLIEQNAIDLAANSRIIHNYDTRNLLYLHYISTEKLVFITPRNYFRNRDKTQVFINPFSVAYMLTNVLLSFGVPMIIFLLEYAACRLDVPREPSSHTFGTKVL…
AgamGLUvir133	AgIR133	AGAP005677	2L: 18,651,360-18,653,143 (-)	MCLFEIDCKSPIQRGGGRGGGGRISTKSNITMTGPPRSTGPLAAAQSAHLETLVNITKGIHKIETPSAKYELCLVTHATDPYWSSVVVGYLSHFSSYPRVFLNAVQRNVQLHRCSVYLIVAPLIEGKQLYGLLQNVSAGRNWNPAAHYIVAINDRPTLTSLVNVFRAFPPLGIRNGAVVRYRRGIIDTLVCDYNTSRVYVVTGTDAKHRSWLTHDRNRNLDRLPVRIKTSMEFPFLIVSQKGIAGVYRWFFVAFAKHINALALFDRQPNTTRYEIALKIHDTYRDTLKPVAFGSFSGDCVVLPEVSKRGLFYFLLLPFTRPVWLMCGLLATGSFLLNWLQAQRFPNALLLTLLFGDQAQRYTLAERRLLTVGSVLLFTLTEAYWGKLHALFMVSLNEPH…
AgamGLUvir134	AgIR134	AGAP005678	2L: 18,657,551-18,659,242 (-)	MALQAQSDDTLSQSVLITLRHVTTRAEFLERPSAGQELCISTSATHPHWNDVLQAYLHEFPLYPRVLTSIEIMSDVKLPKCSLYLLFEPNASARQLFLLLKAISSNSNWNTPAHVILLTGWIERPDQFKTLFKVFYTMGMHNVLHLVANREGNDSAIVACIERGFIQSFRPGSPHYRQLLADRTSNLHQLPLVIEKKVVYPYLMYTRDTVSGVYRQFFDAFAAHINVRVTFDTTDNQILLGIKAPNALSVPIAADGAFTGNCLVVPEKPKAGLIHYLLFPFTAPLWYLCCCLAGATIVLNCRCPARFGHSILLTILFGDQDTRNSYGRTERRLIFFAVLVMFFLSEAYTARLLSEFIRSLNEPHLTTIRQFAASGITLELPSVQRDRATLLTEELRHNL…
AgamGLUvir135	AgIR135	AGAP005679	2L: 18,662,281-18,664,071 (-)	MGNMGGVLGTVSAQFTHSKLRTFAMVPPPFDWALLLVRFGLLAADSSPSADAALASLAYLTAHPGTALERPAAGQELCIAPPPDNDPYWNDVLERYLHHFPLLPRVLTRTKLGDNIPLHRCSLYLLFEPASHARQVFLRIQFLSTNGNWNPSARFAVLINARSHTSEIFNQFENFDLMGVRHGLVLMSVPEHNRTFTMLANCRQRTLDYVMDVSDVGELLANHSSLGLQQSEPIVVARRAEFPFFIHDRSRIEGVYCKFFTAFARKYKARVVFGDRNVQIVMTIHNRETLTQPYAIGSFTGNCVIVPERPKAGLVHFMLSPFSSPVWYLCCCFLAAIFLLNWRWSHRFQHNILLTVLFGDQAADERYSLPERRLIFLAIVLMFFFSEAYSAKLLSTFIE…
AgamGLUvir136	AgIR136	AGAP006440	2L: 31,959,226-31,960,962 (-)	MSSPNSTFVQMFANERSTTAALLISVLVRIINKTDRFGSNAVALFNFNTHCMDHVPDQLLKQISTITLLNYDSSPLIKDTFERPNFFLHIHGYKVAANVTTNDIITQQVKMFYLYRLFGITERVVVVFDQTVPEPNPLHKVATLYHRHGVINVIYIVMFRAQLLVFRLDRQYKAFIEVPITASLQTLFPDRLSNLSGQPYMVATYENPPKSYADSSRRIVGADIELIAIITHHQSTFAFFNYSTKPGPIFVPWDDRTFDFATYRIIYKGAVQYPFSSLLFPDRQSSCIAVPRWFNRVLQEQVIWPFALDLWALSGGLAAFYVWYLLVLAPHLRQHRRDMYDLVNTPLHIFRIVLLFLLTEYYTALLTSSLGLSQVPFYPTTIQEFVKTPTPLLVLRRDL…
AgamGLUvir137	AgIR137	-	2L: 31,957,279-31,958,959 (-)	MTLIGGILLEPATADSLLVSFLIRVIFELHQDHPNPSNVGLVNFDSQNLSYIPTELMKHVTDVTFLNIDINEQRTETKAIHYAPILVHAFGISKPNGPSEESPIQSEVLNILEYFKLIEKTKNIIVLLDAYGVKPTELDLLAKTYHHFGAIDIIYVLLKMKEPIVIRLNDMSTEFVKLSTFARIEQLFPDRLANMSGRPYKVACLENPPLSFRSPATNRTIGIDVEFIDMIAKHQHTVADYRYTAQPIELFEPWHSTEIDFATYRIILTEQAYKFALLFLPNQNLWCLAVPKTYNRILHQQILWPYTTDMWLLIGTIVICFLLYRLILKHTLQRRHPNAFPIINTPLHILRILLLFLLSEYYTALLSSNLGLSKLPAYPRTFEQFKKSTIPLIVHRPES…
AgamGLUvir138	AgIR138	-	2L: 31,954,985-31,956,676 (-)	MDSSLIYTQEGSATSGLLISFLVRIINELHCDRCSQSTVGFVNFNTPHSFSYIPSQLMQQLSTVTFASIDLRQDGCQLQSLNTPIVIHAVTSFQWMKNKLYILKDVLDTLQHFGLYGKSKKLIVLIDMNRVTMAELKVLKESYQHAGAIDILYVLEHSNFNQLNIMIPTRHNRTTLVHRSAESSIEQLFPDRLSNQSGQPYKVACIENRPLTYRDASSGRIIGIDVDFIDIIAKHQRTVAQFKHTADPIKQFKSWYDVEFDMATYRVPDGGLAYPFAPLYFPNQFRWCLAVPKTYDRVIHDQVIWPYQPPLWAMILSLAAFLIVYRLFLRQPIQHQYPDVFPAIDTPLQLLRMLLLFLMTEYYTAKLTAILGLSEVPIYPRTLAEFSSSPIPLLASHRS…
AgamGLUvir139	AgIR139	AGAP006691	2L: 36,737,099-36,738,805 (-)	MSSRKIVLVSLILTFYSVHTLPKRQAGIVDYLAHMAAALQMQHFGVFNCWLLQFSNGTNLSPLLTSIVQRLSNEHISLVQADHSGRHIPTHQEPNMVIMLWGNEQQMLDQFYINQWLWEIPSDCRTIVLFELDASGASSLPWQIGEYFESLMLYYVACIAINKNALFSFHYQPLRIVSHSCFPDLSELFFDRLQTIQNKQFAAGYMKDHYTAMYCGQMYGEDTALFLLFVDRLGLTLQLQEVLCDGFESLVSCVARYNGIHFLLNRLYFTQYNKHVISASAMEQFTIATPKGRLLTVWEILLKPFHHSAWGLILGILVTLQLINQLKPTLFSNNLLALALFGFEKHQLRLTKRVEKATAFALIVLFFQLKCAYEAKLVSYIAEPPRLPDAASIEDLRER…
AgamGLUvir140.1	AgIR140.1	AGAP013242	2R: 16,645,150-16,647,020 (+)	MVMSQAIVVAVFTYLALLAPDGNAFDTFPLLTPLESNISFILKAFVELQSQWCPPWRYKKFYILNYNSDQLSEDILTGILQLNGPPWIISTEASGLTYWTYENNRCAVIMVSGYERMRPARPLYYGSRYFIFHPNLVEGNVFMDQINSGMSCILDKAYFIVYNRTTIEIQHKNFFTNRTIQLDPANIQVTDDLKDLYGRKLHIALPEGNEEVATFERYLAETICQQRNASYEISSLYDASVDYGVVNMGVPFPTTDKTVALGSTFVSVMVPRSKPKPIIAVLIDPFDYYTWITLFVLIFLLALVLSLFGKVLSRWNIAENALEMIMCILGGPTRQYGGWFENQIITNYCLLAIVIVYSYQSLIISYLTYTRYSPEINTMDEIRNNCIFPSGSSWAAYFD…
AgamGLUvir140.2	AgIR140.2	AGAP013436	2R: 16,642,268-16,643,951 (+)	MKAFVELQSQWCPPWKYKKFYFLNYNSHPLAEDIFTAILKLNEPPRLIFNEASAFHYWTYEHNRCAPVLKPVYLGSRYLIFHPNLEEGNVFLEQLHSGISCILDRAYYLVYDYTTIQIQHKNFFSNRTIQLDPANIRVPDDLKDLHGRKLHISLPEGNEDVVTFDLYLAETICQQRNATYELQSINSTLLDYGVVHIGIPLLGTDKTVALGSTFVSVMVPHSKPKPIIAVLIDPFDYYTWITLFVLIFLLALVLSLFGKVLSQWNIIENALEMIMCILGGPTRQYGGWFENQIITNYCLLAIVIVSSYQSLIISYLTYTRYSPEINTEDEIRSSCIFPFESNWARHYDFELDGEYDDERDNMCFLLLSRDDPHITTLLMENTRDIDPAAEQAYKRNLRV…
AgamGLUvir141	AgIR141	AGAP013473	2R: 31,458,247-31,463,898 (+)	MMRKALAFIVPLLLPMLIFTPHTQSGPSRPGGDRDGRHIHRLSIASHETRVEFWTQLIAYMDCSHVVLLDSFEFFANRPTFARQLFARLNDAGIRVSVQRRLREVRRLPPVTHRLAIIVPIVMNPSSPFNAELDTFIGQIAQESNFVEFYRWLFVFRASHKKSVWRALQQLPIRADSHVYAVIVVPTAKTVPFDDRIHLERKMMPLERFVRRMQMLPPHHPEAATRTSAILTLPGHTTAAGWVAVWQLYRLHTRMKTIDVAIELLETSTEGRMILYRGVAPEQRNDFFGQATITTMVHRSAPHHINSTYVAQSIPMFRNASTRIRTYRIGSGRHKVDLHFQLITTNRFNQRLQGWYSYSLPLFHEHLTMYIHYTHLSYHEQSSQILSIVLLPFALLGLL…
AgamGLUvir142	AgIR142	AGAP006407	2L: 31,561,183-31,564,566 (+)	MLPTMNDFSSVRSTTMNTTVLFSVLLAGLLQSVSNKHSSLYATVGRLTKEAYRSRFHSVKQVYAVGIPDEAFGEWNAYVPMISLQEPYTIRWKLENAFVIVKISKFLTLNVLSAILSHARDVEKVFLAVIIDSPPSHHTLKQLTGMLLKRGLLNYCIIHTNTHGIEPSLLKYDTIANHFQSHDLNTSIELLFPPFLRTLEGHKLNALLSDNYPYAYLLSSVWEGVDAYILTLARESFHFEVQLINMAINRQNALHRMDLIRQRLENGTIDIHMPRAHVSRSYLNVDVAAAYEWEALVLVVPKSDQLNLINIMLQPFTIEVWTIVLAYLLVRQMIKLFSFFKRRCNRFTLKKTLTCRWSFGSFGSLTTVGVELVSFLLIEAYLAKITEFLLYCRFRSDPQ…
